# Supplementary material
Source: PubMed Central journal article supplement (PMC3107738)
Supplement: NIHMS296081-supplement-supplementary_materials.pdf [file NIHMS296081-supplement-supplementary_materials.pdf]

Supplementary information S1 (table) | **A comprehensive list of the known human E2 enzymes and their key features.**

| UniPro accession No. | Gene name     | Other names                 | Amino acids | Yeast homologue | Additional features                        | Chain product                                | Known function              |
|----------------------|---------------|-----------------------------|-------------|-----------------|--------------------------------------------|----------------------------------------------|-----------------------------|
| P49459               | <i>UBE2A</i>  | HR6A, RAD6A                 | 152         | UBC2/ Rad6      |                                            |                                              | DNA repair                  |
| P63146               | <i>UBE2B</i>  | HR6B, RAD6B                 | 152         | UBC2/Rad6       |                                            |                                              | DNA repair                  |
| O00762               | <i>UBE2C</i>  | UBCX, UbcH10                | 179         |                 | N-terminal extension                       | Lys11 chain                                  | Cell cycle regulation       |
| P51668               | <i>UBE2D1</i> | UbcH5A, E2-17K1             | 147         | UBC4 or UBC5    |                                            |                                              |                             |
| P62837               | <i>UBE2D2</i> | UbcH5B, UBC4, E2-17K2       | 147         | UBC4 or UBC5    |                                            |                                              |                             |
| P61077               | <i>UBE2D3</i> | UbcH5C, E2-17K3             | 147         | UBC4 or UBC5    |                                            |                                              |                             |
| Q9Y2X8               | <i>UBE2D4</i> | HBUCE1                      | 147         | UBC4 or UBC5    |                                            |                                              |                             |
| P51965               | <i>UBE2E1</i> | UbcH6                       | 193         |                 | N-terminal extension                       |                                              |                             |
| Q96LR5               | <i>UBE2E2</i> | UbcH8                       | 201         |                 | N-terminal extension                       |                                              |                             |
| Q969T4               | <i>UBE2E3</i> | UBCE4, UbcH9, UbcM2, E2-23K | 207         |                 | N-terminal extension                       |                                              |                             |
| Q969M7               | <i>UBE2F</i>  | NCE2                        | 185         |                 | 5 isoforms                                 | NEDD8 conjugation                            |                             |
| P62253               | <i>UBE2G1</i> | Ubc7                        | 170         | UBC7            | Acidic loop                                | Lys48 chain                                  | ER quality control          |
| P60604               | <i>UBE2G2</i> | Ubc7                        | 165         | UBC7            | Acidic loop                                | Lys48 chain                                  | ER quality control          |
| P61086               | <i>UBE2H</i>  | UbcH2, E2-20K               | 183         | UBC8            | C-terminal extension                       |                                              |                             |
| P63279               | <i>UBE2I</i>  | Ubc9                        | 158         | UBC9            |                                            | SUMO conjugation                             |                             |
| Q9Y385               | <i>UBE2J1</i> | NCUBE1                      | 318         | UBC6            | C-terminal TM domain                       |                                              | ER quality control          |
| Q8N2K1               | <i>UBE2J2</i> | NCUBE2                      | 259         | UBC6            | C-terminal TM domain, 2 isoforms           |                                              | ER quality control          |
| P61086               | <i>UBE2K</i>  | Ubc1, HIP-2, E2-25K         | 200         | UBC1            | C-terminal extension with UBA, 2 isoforms. | Lys48 chain                                  | Protein quality control     |
| P68036               | <i>UBE2L3</i> | UbcH7, E2-F1, L-UBC, UBCE7  | 154         |                 |                                            |                                              |                             |
| O14933               | <i>UBE2L6</i> | UbcH8, RIG-B                | 152         |                 |                                            | ISG15 conjugation, also conjugates ubiquitin | Interferon signalling       |
| P61081               | <i>UBE2M</i>  | Ubc12                       | 183         | UBC12           | N-terminal extension                       | NEDD8 conjugation                            | Regulation of SCF           |
| P61088               | <i>UBE2N</i>  | Ubc13, BLU                  | 152         | UBC13           | form UBC13-UBE2V1 heterodimer              | Lys63 chain                                  | NFκB signalling, DNA repair |
| Q5JXB2               | <i>UBE2NL</i> |                             | 153         | UBC13           | No active site Cys                         |                                              |                             |
| Q9C0C9               | <i>UBE2O</i>  | E2-230K                     | 1292        |                 | Both N-, C- extensions                     |                                              |                             |
| Q7Z7E8               | <i>UBE2Q1</i> | NICE-5, Ube2Q               | 422         |                 | N-terminal extension, 2 isoforms           |                                              |                             |
| Q8WVN8               | <i>UBE2Q2</i> |                             | 375         |                 | N-terminal extension, 2 isoforms           |                                              |                             |
| P49427               | <i>UBE2R1</i> | Cdc34, Ubc3, E2-32K         | 236         | UBC3, Cdc34     | Acidic loop, C-terminal extension          | Lys48 chain                                  | Cell cycle regulation       |
| Q712K3               | <i>UBE2R2</i> | Cdc34B, Ubc3B               | 238         | UBC3, Cdc34     | Acidic loop, C-terminal extension          | Lys48 chain                                  | Cell cycle regulation       |
| Q16763               | <i>UBE2S</i>  | E2-EPF5, E2-24K             | 222         |                 | C-terminal extension                       | Lys11 chain                                  | Cell cycle regulation       |
| Q9NPD8               | <i>UBE2T</i>  | HSPC150                     | 197         |                 | C-terminal extension                       | Mono-ubiquitylation                          | DNA repair                  |
| Q5VVX9               | <i>UBE2U</i>  |                             | 321         |                 | C-terminal extension, 2 isoforms           |                                              |                             |

## SUPPLEMENTARY INFORMATION

|               |               |                    |      |      |                                                                               |                                 |                             |
|---------------|---------------|--------------------|------|------|-------------------------------------------------------------------------------|---------------------------------|-----------------------------|
| Q13404        | <i>UBE2V1</i> | UEV-1              | 221  |      | No active site Cys, N-terminal extension, UBC13-UEV-1 heterodimer, 5 isoforms | Lys63 chain                     | NFκB signalling, DNA repair |
| Q15819        | <i>UBE2V2</i> | MMS2, EDPF-1, UEV2 | 145  | Mms2 | No active site Cys, UBC13-UEV-2 heterodimer                                   | Lys63 chain                     | NFκB signalling, DNA repair |
| Q8IX04        | <i>UBE2V3</i> | UEVLD, UEV-3       | 471  |      | No active site Cys, C-terminal extension, 5 isoforms                          |                                 |                             |
| Q96B02        | <i>UBE2W</i>  |                    | 151  |      | 2 isoforms                                                                    |                                 |                             |
| Q9H832        | <i>UBE2Z</i>  | Use1, HOYS7        | 354  |      | N- and C-terminal extensions, 2 isoforms                                      | Acts with the second Ub E1 Uba6 |                             |
| Q9H8T0        | <i>AKTIP</i>  | FTS                | 292  |      | No active site Cys, N- and C- terminal extensions                             |                                 |                             |
| UPI0000DBEF4D | <i>BIRC6</i>  | Bruce, Apollon     | 4829 |      | N- and C-terminal extensions                                                  |                                 | Apoptosis, cytokinesis      |
